# Supplementary material for: Diets, Dietary Patterns, Single Foods and Pancreatic Cancer Risk: An Umbrella Review of Meta-Analyses
Source: MDPI journal article supplement (doi:10.3390/ijerph192214787), 2022-11-10
Supplement: s1 [file s1]

**Supplementary Table S1. Literature search strategy used for each database considered**

| Database       | Syntax                                                                                                                                                                                                                                                                                                                                                                                                                                             |
|----------------|----------------------------------------------------------------------------------------------------------------------------------------------------------------------------------------------------------------------------------------------------------------------------------------------------------------------------------------------------------------------------------------------------------------------------------------------------|
| PubMed/MEDLINE | "Pancreatic Neoplasms"[MeSH Terms] OR ("Pancreas"[Title/Abstract] OR "pancreatic"[Title/Abstract]) AND ("Cancer"[Title/Abstract] OR "tumor"[Title/Abstract] OR "neoplasm"[Title/Abstract] OR "cancers"[Title/Abstract] OR "tumors"[Title/Abstract] OR "neoplasms"[Title/Abstract]) AND "Diet, Food, and Nutrition"[Mesh] OR "Food"[Mesh] OR "Diet"[Mesh] OR diet* AND ((meta-analys*[tw] OR meta-analys*[tw]) OR (systematic[tw] and review*[tw])) |
| Scopus         | ( TITLE-ABS-KEY ( pancreas OR pancreatic ) ) AND ( TITLE-ABS-KEY ( cancer OR neoplasm ) ) AND ( TITLE-ABS-KEY ( diet OR food OR nutrition ) ) AND ( TITLE-ABS-KEY ( meta-analys* OR meta-analys* OR systematic AND review* ) )                                                                                                                                                                                                                     |
| EMBASE         | 'pancreas tumor'/exp OR 'pancreas tumor' OR 'pancreas cancer'/exp OR 'pancreas cancer' AND 'dietary intake'/exp OR 'dietary intake' OR 'diet'/exp OR diet OR 'nutrition'/exp OR nutrition OR 'food'/exp OR food AND 'meta analysis (topic)'/exp OR 'meta analysis (topic)' OR 'systematic review (topic)'/exp OR 'systematic review (topic)'                                                                                                       |
| Web of Science | (TS=(pancreatic OR pancreas)) AND TS=(cancer OR tumor OR neoplastic) AND TS=(diet OR food OR nutrition) AND TS=(meta-analys* OR meta analys* OR systematic review)                                                                                                                                                                                                                                                                                 |
| Cochrane       | pancreas OR pancreatic in Title Abstract Keyword AND "Cancer" OR neoplasm OR tumor in Title Abstract Keyword AND "dietary" OR diet OR food OR nutrition in Title Abstract Keyword - (Word variations have been searched)                                                                                                                                                                                                                           |

**Supplementary Table S2. Detailed exclusion motivations**

| <b>References</b>                                                                    | <b>n</b> | <b>Reasons of exclusion</b>                                                                            |
|--------------------------------------------------------------------------------------|----------|--------------------------------------------------------------------------------------------------------|
| Genkinger, 2014; Koushik, 2012; Michaud, 2005; Turati, 2015                          | 4        | pooled analyses derived from consortium study and not systematic reviews with meta-analysis            |
| Elands, 2016; Fabiani, 2016; Grosso, 2017; Psaltopoulou, 2011; Wu 2015; Zahedi, 2020 | 6        | Pancreatic cancer risk not assessed separately but in combination with other gastrointestinal cancers. |
| Schwingshackl, 2015                                                                  | 1        | Duplication data.                                                                                      |

**Supplementary Table S3. Inclusion/Exclusion criteria reported by each included studies, declined according to the PICOS (Population, Inclusion/Exclusion, Control/Comparator and Study design).**

| Author, year           | Population                            | Intervention/exposure                                                                                           | Control/comparators     | Outcome                                                                             | Study design                                                                                                                                                    |
|------------------------|---------------------------------------|-----------------------------------------------------------------------------------------------------------------|-------------------------|-------------------------------------------------------------------------------------|-----------------------------------------------------------------------------------------------------------------------------------------------------------------|
| Alizadeh, 2017         | Inclusion: Adult ( $\geq 18$ years)   | Inclusion: Dietary patterns (Healthy and Western) assessed by FA or PCA                                         | Inclusion: High vs. low | Inclusion: Pancreatic cancer risk                                                   | Inclusion: prospective cohorts and case-control studies                                                                                                         |
|                        | Exclusion: n.s.                       | Exclusion: a priori method or statistical methods other than FA or PCA, or focused on single foods or nutrients | Exclusion: n.s.         | Exclusion: n.s.                                                                     | Exclusion: methodological studies, reviews, editorials, comments, cross-sectional or animal studies                                                             |
| Bae, 2009              | Inclusion: Adult ( $\geq 18$ years)   | Inclusion: Citrus fruit                                                                                         | Inclusion: High vs. low | Inclusion: Pancreatic cancer risk                                                   | Inclusion: comparative epidemiological studies                                                                                                                  |
|                        | Exclusion: n.s.                       | Exclusion: studies not measuring the intake of citrus fruit or citrus juice at the individual level             | Exclusion: n.s.         | Exclusion: studies not reporting the ES of the associated measure of association    | Exclusion: no original data, that is, reviews, meta-analysis;                                                                                                   |
| Daroohegi Mofrad, 2021 | Inclusion: Adult ( $\geq 18$ years)   | Inclusion: potato consumption, boiled, baked, roasted, mashed, or fried (potato chips or French fries)          | Inclusion: High vs. low | Inclusion: Pancreatic cancer risk reported as HR, RR, or OR with 95% CI             | Inclusion: cohort or case-control or pooled study designs                                                                                                       |
|                        | Exclusion: pregnant women or children | Exclusion: potato consumption along with other food items or potatoes other than white or yellow potatoes       | Exclusion: n.s.         | Exclusion: Risk of cancer types other than pancreatic cancer                        | Exclusion: unpublished data or gray literature, such as conference articles, editorials, theses, and patents; animal, ecologic, cross-sectional studies, or RCT |
| Gao, 2022              | Inclusion: Adult ( $\geq 18$ years)   | Inclusion: Poultry; fish                                                                                        | Inclusion: High vs. low | Inclusion: Pancreatic cancer risk                                                   | Inclusion: case-control or cohort studies                                                                                                                       |
|                        | Exclusion: n.s.                       | Exclusion: n.s.                                                                                                 | Exclusion: n.s.         | Exclusion: n.s.                                                                     | Exclusion: abstracts but no full text or with no data on poultry or fish consumption                                                                            |
| Grosso, 2017           | Inclusion: Adult ( $\geq 18$ years)   | Inclusion: Adherence to a posteriori-derived dietary pattern (Healthy/prudent or Unhealthy diets)               | Inclusion: High vs. low | Inclusion: Pancreatic cancer risk                                                   | Inclusion: Cohort and case-control studies                                                                                                                      |
|                        | Exclusion: n.s.                       | Exclusion: n.s.                                                                                                 | Exclusion: n.s.         | Exclusion: Risk of cancer types other than pancreatic cancer or lack of an assessed | Exclusion: studies with lack of statistics or results                                                                                                           |

|               |                                                                                                                                                  |                                                                                                                                           |                                                                                                                                           |                                                                                        |                                                                           |
|---------------|--------------------------------------------------------------------------------------------------------------------------------------------------|-------------------------------------------------------------------------------------------------------------------------------------------|-------------------------------------------------------------------------------------------------------------------------------------------|----------------------------------------------------------------------------------------|---------------------------------------------------------------------------|
|               |                                                                                                                                                  |                                                                                                                                           |                                                                                                                                           | composite outcome (eg, overall cancer mortality)                                       |                                                                           |
| Guo, 2021     | Inclusion: Adult ( $\geq 18$ years)                                                                                                              | Inclusion: DII score category as exposure                                                                                                 | Inclusion: High vs. low                                                                                                                   | Inclusion: Pancreatic cancer risk                                                      | Inclusion: RCTs, observational studies or case-control                    |
|               | Exclusion: n.s.                                                                                                                                  | Exclusion: DII score measured as a continuous variable                                                                                    | Exclusion: n.s.                                                                                                                           | Exclusion: studies without reporting multi-covariate adjusted risk estimates           | Exclusion: n.s.                                                           |
| Han, 2019     | Inclusion: Adult ( $\geq 18$ years)                                                                                                              | Inclusion: Red or processed meat                                                                                                          | Inclusion: Low vs. high                                                                                                                   | Inclusion: Pancreatic cancer risk                                                      | Inclusion: Systematic reviews with meta-analyses of observational studies |
|               | Exclusion: pregnant or subjects with a major chronic illness at baseline, or when results were not reported separately compared to those without | Exclusion: if only specific type of red meat (such as beef or lamb) or a specific type of processed meat (such as hot dogs) were assessed | Exclusion: diet intake assessed at a previous point in life (for example, if adults recalled their diet during adolescence and childhood) | Exclusion: Risk of cancer types other than pancreatic cancer; overall cancer mortality | Exclusion: n.s.                                                           |
| Jacobs, 1998  | Inclusion: Adult ( $\geq 18$ years)                                                                                                              | Inclusion: Whole grain                                                                                                                    | Inclusion: High vs. low                                                                                                                   | Inclusion: Pancreatic cancer risk                                                      | Inclusion: n.s.                                                           |
|               | Exclusion: n.s.                                                                                                                                  | Exclusion: n.s.                                                                                                                           | Exclusion: n.s.                                                                                                                           | Exclusion: Risk of cancer types other than pancreatic cancer                           | Exclusion: n.s.                                                           |
| Jayedi, 2018  | Inclusion: Adult ( $\geq 18$ years)                                                                                                              | Inclusion: the newly developed DII expressed in categories or as a continuous score                                                       | Inclusion: 1-unit increment in the Dietary Inflammatory Index                                                                             | Inclusion: Pancreatic cancer risk                                                      | Inclusion: cohort or case-control studies                                 |
|               | Exclusion: patients with specific diseases                                                                                                       | Exclusion: n.s.                                                                                                                           | Exclusion: n.s.                                                                                                                           | Exclusion: Risk of cancer types other than pancreatic cancer                           | Exclusion: cross-sectional studies                                        |
| Jiang, 2019   | Inclusion: Adult ( $\geq 18$ years)                                                                                                              | Inclusion: Fish                                                                                                                           | Inclusion: High vs. low                                                                                                                   | Inclusion: Pancreatic cancer risk                                                      | Inclusion: prospective studies                                            |
|               | Exclusion: n.s.                                                                                                                                  | Exclusion: n.s.                                                                                                                           | Exclusion: n.s.                                                                                                                           | Exclusion: risk estimates not reported HR, RR, or OR with 95% CI                       | Exclusion: n.s.                                                           |
| Larsson, 2012 | Inclusion: Adult ( $\geq 18$ years)                                                                                                              | Inclusion: Red and/or processed meat                                                                                                      | Inclusion: High vs. low                                                                                                                   | Inclusion: Pancreatic cancer risk                                                      | Inclusion: prospective studies                                            |
|               | Exclusion: n.s.                                                                                                                                  | Exclusion: n.s.                                                                                                                           | Exclusion: n.s.                                                                                                                           | Exclusion: n.s.                                                                        | Exclusion: n.s.                                                           |

|                     |                                     |                                                                                                                                                                   |                         |                                                                                                                                                      |                                                                                                                    |
|---------------------|-------------------------------------|-------------------------------------------------------------------------------------------------------------------------------------------------------------------|-------------------------|------------------------------------------------------------------------------------------------------------------------------------------------------|--------------------------------------------------------------------------------------------------------------------|
| Lei, 2016           | Inclusion: Adult ( $\geq 18$ years) | Inclusion: whole grain or whole wheat foods                                                                                                                       | Inclusion: High vs. low | Inclusion: Pancreatic cancer risk                                                                                                                    | Inclusion: case-control or cohort study                                                                            |
|                     | Exclusion: n.s.                     | Exclusion: n.s.                                                                                                                                                   | Exclusion: n.s.         | Exclusion: risk estimates not reported as HR, RR, or OR with 95% CI                                                                                  | Exclusion: n.s.                                                                                                    |
| Li, 2015            | Inclusion: Adult ( $\geq 18$ years) | Inclusion: Healthy/prudent diets; cruciferous vegetables                                                                                                          | Inclusion: High vs. low | Inclusion: Pancreatic cancer risk                                                                                                                    | Inclusion: case-control or cohort study design                                                                     |
|                     | Exclusion: n.s.                     | Exclusion: n.s.                                                                                                                                                   | Exclusion: n.s.         | Exclusion: n.s.                                                                                                                                      | Exclusion: n.s.                                                                                                    |
| Lu, 2017            | Inclusion: Adult ( $\geq 18$ years) | Inclusion: Factor analysis and/or principal component analysis to identify the Western Diet or Healthy pattern                                                    | Inclusion: High vs. low | Inclusion: Pancreatic cancer risk                                                                                                                    | Inclusion: original report                                                                                         |
|                     | Exclusion: n.s.                     | Exclusion: n.s.                                                                                                                                                   | Exclusion: n.s.         | Exclusion: n.s.                                                                                                                                      | Exclusion: NA                                                                                                      |
| Naghshi, 2021       | Inclusion: Adult ( $\geq 18$ years) | Inclusion: Nuts considered as tree nuts and peanuts, walnuts, pistachios, macadamia nuts, pecans, cashews, almonds, hazelnuts, and Brazil nuts, and peanut butter | Inclusion: High vs. low | Inclusion: Pancreatic cancer risk                                                                                                                    | Inclusion: observational studies with prospective, case-control, or cross-sectional designs                        |
|                     | Exclusion: n.s.                     | Exclusion: dietary pattern containing a high amount of nuts                                                                                                       | Exclusion: n.s.         | Exclusion: Risk of cancer types other than pancreatic cancer, risk of cancer recurrence, or risk estimates not reported as HR, RR, or OR with 95% CI | Exclusion: letters, comments, short communications, reviews, meta-analyses, ecological studies, and animal studies |
| Paluszkiewicz, 2012 | Inclusion: Adult ( $\geq 18$ years) | Inclusion: Fruits (total); vegetables (total); red meat; poultry; eggs; fish                                                                                      | Inclusion: High vs. low | Inclusion: Pancreatic cancer risk                                                                                                                    | Inclusion: observational studies                                                                                   |
|                     | Exclusion: n.s.                     | Exclusion: n.s.                                                                                                                                                   | Exclusion: n.s.         | Exclusion: n.s.                                                                                                                                      | Exclusion: reviews, animal studies, and experimental studies                                                       |
| Qin, 2021           | Inclusion: Adult ( $\geq 18$ years) | Inclusion: fish or LC-PUFA intake                                                                                                                                 | Inclusion: High vs. low | Inclusion: Pancreatic cancer risk                                                                                                                    | Inclusion: cohort studies or case-control studies                                                                  |
|                     | Exclusion: n.s.                     | Exclusion: n.s.                                                                                                                                                   | Exclusion: n.s.         | Exclusion: risk estimates not reported as HR, RR with 95% CI                                                                                         | Exclusion: n.s.                                                                                                    |

|                     |                                     |                                                                                                   |                         |                                                                                                                                                                                               |                                                                                                                  |
|---------------------|-------------------------------------|---------------------------------------------------------------------------------------------------|-------------------------|-----------------------------------------------------------------------------------------------------------------------------------------------------------------------------------------------|------------------------------------------------------------------------------------------------------------------|
| Schwingshackl, 2014 | Inclusion: Adult ( $\geq 18$ years) | Inclusion: Adherence to MedDiet                                                                   | Inclusion: High vs. low | Inclusion: Pancreatic cancer risk                                                                                                                                                             | Inclusion: cohort or case-control study design                                                                   |
|                     | Exclusion: n.s.                     | Exclusion: n.s.                                                                                   | Exclusion: n.s.         | Exclusion: Risk of cancer types other than pancreatic cancer                                                                                                                                  | Exclusion: n.s.                                                                                                  |
| Wu, 2016            | Inclusion: Adult ( $\geq 18$ years) | Inclusion: fruit, vegetable, or total fruit and vegetable intakes                                 | Inclusion: High vs. low | Inclusion: Pancreatic cancer risk                                                                                                                                                             | Inclusion: observational design (e.g. cohort, nested case-control, or case-control study)                        |
|                     | Exclusion: n.s.                     | Exclusion: n.s.                                                                                   | Exclusion: n.s.         | Exclusion: risk estimates not reported as HR, RR, or OR with 95% CI or the study reported risk estimates that could not be summarized                                                         | Exclusion: reviews without original data, ecological studies, editorials, and case reports                       |
| Yu, 2014            | Inclusion: Adult ( $\geq 18$ years) | Inclusion: Fish                                                                                   | Inclusion: High vs. low | Inclusion: Pancreatic cancer risk                                                                                                                                                             | Inclusion: prospective studies                                                                                   |
|                     | Exclusion: n.s.                     | Exclusion: frequency of fish consumption not reported                                             | Exclusion: n.s.         | Exclusion: Risk of gastrointestinal cancers other than pancreatic cancer; risk estimates not reported as HR, RR with 95% CI or the study reported risk estimates that could not be summarized | Exclusion: case-control design                                                                                   |
| Zhang, 2020         | Inclusion: Adult ( $\geq 18$ years) | Inclusion: Nuts consumption                                                                       | Inclusion: High vs. low | Inclusion: Pancreatic cancer risk                                                                                                                                                             | Inclusion: observational or clinical design                                                                      |
|                     | Exclusion: n.s.                     | Exclusion: nut consumption assessment performed in combination with that for other food groups    | Exclusion: n.s.         | Exclusion: Risk of cancer types other than pancreatic cancer                                                                                                                                  | Exclusion: cross-sectional studies, animal studies, systematic reviews, meta-analyses, letters, and commentaries |
| Zhao, 2017          | Inclusion: Adult ( $\geq 18$ years) | Inclusion: Red and processed meat                                                                 | Inclusion: High vs. low | Inclusion: Pancreatic cancer risk                                                                                                                                                             | Inclusion: observational studies                                                                                 |
|                     | Exclusion: n.s.                     | Exclusion: white meats and total meats without distinguishing red or processed meat were excluded | Exclusion: n.s.         | Exclusion: n.s.                                                                                                                                                                               | Exclusion: narrative reviews, systematic reviews, and meta-analyses, comments, case reports, editorials          |
| Zhao, 2022          | Inclusion: Adult ( $\geq 18$ years) | Inclusion: Plan-based diet                                                                        | Inclusion: High vs. low | Inclusion: Pancreatic cancer risk                                                                                                                                                             | Inclusion: cohort studies or case-control studies                                                                |

|  |                 |                                |                 |                                                                          |                                                                       |
|--|-----------------|--------------------------------|-----------------|--------------------------------------------------------------------------|-----------------------------------------------------------------------|
|  | Exclusion: n.s. | Exclusion: other diet patterns | Exclusion: n.s. | Exclusion: Risk of gastrointestinal cancers other than pancreatic cancer | Exclusion: Case reports or case series, editorials, narrative reviews |
|--|-----------------|--------------------------------|-----------------|--------------------------------------------------------------------------|-----------------------------------------------------------------------|

CI: Confidence Interval; DII: Dietary Inflammatory Index; ES: Effect Size; FA: factor analysis, HR: hazard risk; LC-PUFA: long-chain n-3 polyunsaturated fatty acids; MedDiet: Mediterranean diet; OR: odds ratio; PCA: principal component analysis; n.s.: not specified; RCT: randomized clinical trials; RR: relative risk

**Supplementary Table S4. Definition of diets/dietary patterns used in each included study**

|                     | <b>Healthy/prudent diet</b>                                                                                                                                                     | <b>Mediterranean diet</b>                                                                                        | <b>Plant-based diet</b> | <b>Dietary Inflammatory Index</b>                       | <b>Western diet</b>                                                                                                                                                                           | <b>Unhealthy diet</b>                                                                                                             |
|---------------------|---------------------------------------------------------------------------------------------------------------------------------------------------------------------------------|------------------------------------------------------------------------------------------------------------------|-------------------------|---------------------------------------------------------|-----------------------------------------------------------------------------------------------------------------------------------------------------------------------------------------------|-----------------------------------------------------------------------------------------------------------------------------------|
| Alizadeh, 2017      | High consumption of fruits, fresh vegetables, legumes, fiber, fish, poultry, whole grains, low-fat dairy products and low consumption of fat dairy, processed food and red meat | n.a.                                                                                                             | n.a.                    | n.a.                                                    | High consumption of red and processed meats, sweets and desserts, soft drinks, refined grains, high-fat dairy products, fast foods and lower loading of fruits, vegetables and dietary fibers | n.a.                                                                                                                              |
| Grosso, 2017        | Fruit or vegetable-based diets and healthy or prudent diets                                                                                                                     | n.a.                                                                                                             | n.a.                    | n.a.                                                    | n.a.                                                                                                                                                                                          | Western, animal-based, diet rich in fat and salty, or with high consumption of salty/sweet snacks, fatty foods, and refined foods |
| Guo, 2021           | n.a.                                                                                                                                                                            | n.a.                                                                                                             | n.a.                    | Literature derived, population-based diet quality index | n.a.                                                                                                                                                                                          | n.a.                                                                                                                              |
| Jayedi, 2018        | n.a.                                                                                                                                                                            | n.a.                                                                                                             | n.a.                    | Literature derived, population-based diet quality index | n.a.                                                                                                                                                                                          | n.a.                                                                                                                              |
| Lu, 2017            | High intake of foods such as vegetables, fruits, whole grains, olive oil, fish, soy, poultry and low-fat dairy                                                                  | n.a.                                                                                                             | n.a.                    | n.a.                                                    | High consumption of e.g., red and/or processed meat, refined grains, sweets, high-fat dairy products, butter, potatoes and high-fat gravy, and low intakes of fruits and vegetables           | n.a.                                                                                                                              |
| Schwingshackl, 2014 | n.a.                                                                                                                                                                            | defined through scores that estimated the conformity of the dietary pattern (including high consumption of olive | n.a.                    | n.a.                                                    | n.a.                                                                                                                                                                                          | n.a.                                                                                                                              |



|            |      |                                                                                                                                                                  |                                                                                                                                                         |      |      |      |
|------------|------|------------------------------------------------------------------------------------------------------------------------------------------------------------------|---------------------------------------------------------------------------------------------------------------------------------------------------------|------|------|------|
|            |      | oil, vegetables, fruits, legumes, cereals, fish and a moderate intake of red wine during meals and low consumption of ed and processed meats and dairy products) |                                                                                                                                                         |      |      |      |
| Zhao, 2022 | n.a. | n.a.                                                                                                                                                             | Fruit or vegetable-based diets, vegetarian, semi-vegetarian, pesco-vegetarian, lacto-ovo-vegetarian, vegan, Mediterranean, and healthy or prudent diets | n.a. | n.a. | n.a. |

n.a.: not applicable

Supplementary Table S5. Item-by-item methodological quality of included meta-analyses

| Meta-analyses            | AMSTAR 2 |             |    |             |     |     |             |             |             |     |     |     |     |     |     |     | Overall confidence |
|--------------------------|----------|-------------|----|-------------|-----|-----|-------------|-------------|-------------|-----|-----|-----|-----|-----|-----|-----|--------------------|
|                          | Q1       | Q2          | Q3 | Q4          | Q5  | Q6  | Q7          | Q8          | Q9          | Q10 | Q11 | Q12 | Q13 | Q14 | Q15 | Q16 |                    |
| Alizadeh, 2017           | No       | Partial yes | No | Yes         | No  | Yes | Partial yes | Partial yes | Yes         | No  | Yes | No  | No  | No  | No  | Yes | Critically low     |
| Bae, 2009                | Yes      | Partial yes | No | Partial yes | Yes | No  | Yes         | Yes         | Yes         | No  | Yes | No  | No  | Yes | Yes | Yes | Low                |
| Daroooghegi Mofrad, 2021 | Yes      | Yes         | No | Partial yes | Yes | Yes | Partial yes | Yes         | Yes         | No  | Yes | No  | Yes | Yes | Yes | Yes | Low                |
| Gao, 2022                | No       | No          | No | Partial yes | Yes | Yes | Partial yes | Yes         | Partial yes | No  | Yes | No  | No  | Yes | Yes | Yes | Critically low     |
| Grosso, 2017             | Yes      | No          | No | Partial yes | No  | Yes | Partial yes | Yes         | Yes         | No  | Yes | No  | No  | Yes | Yes | Yes | Low                |
| Guo, 2021                | Yes      | Yes         | No | Partial yes | Yes | Yes | Partial yes | Yes         | Partial yes | No  | Yes | No  | No  | Yes | No  | Yes | Low                |
| Han, 2019                | Yes      | Yes         | No | Partial yes | Yes | Yes | Partial yes | Yes         | Yes         | No  | Yes | Yes | Yes | Yes | Yes | Yes | Moderate           |
| Jacobs, 1998             | No       | No          | No | No          | No  | No  | No          | Yes         | No          | No  | NA  | NA  | No  | No  | No  | Yes | Critically low     |
| Jayedi, 2018             | Yes      | Partial yes | No | Partial yes | Yes | Yes | Partial yes | Partial yes | Yes         | No  | Yes | Yes | Yes | Yes | Yes | Yes | Moderate           |
| Jiang, 2019              | No       | Partial yes | No | Partial yes | No  | No  | Partial yes | Yes         | Partial yes | No  | Yes | Yes | Yes | Yes | Yes | Yes | Low                |
| Larsson, 2012            | No       | No          | No | Partial yes | No  | No  | No          | Partial yes | Partial yes | No  | Yes | No  | Yes | Yes | Yes | Yes | Critically low     |
| Lei, 2016                | No       | Partial yes | No | Partial yes | No  | Yes | Partial yes | Partial yes | Partial yes | No  | Yes | No  | No  | Yes | No  | Yes | Critically low     |
| Li, 2015                 | Yes      | Partial yes | No | Partial yes | No  | Yes | Partial yes | Yes         | Yes         | No  | Yes | Yes | No  | Yes | Yes | Yes | Moderate           |
| Lu, 2017                 | No       | No          | No | No          | Yes | No  | Partial yes | Yes         | Partial yes | No  | Yes | Yes | No  | Yes | No  | Yes | Critically low     |
| Naghshi, 2021            | Yes      | Partial yes | No | Partial yes | No  | Yes | Yes         | Yes         | Yes         | No  | Yes | Yes | Yes | Yes | Yes | Yes | Moderate           |
| Paluszkiwicz, 2012       | Yes      | Partial yes | No | Partial yes | No  | No  | Partial yes | No          | Partial yes | No  | Yes | No  | No  | Yes | No  | Yes | Critically low     |
| Qin, 2021                | Yes      | Partial yes | No | Partial yes | Yes | Yes | Partial yes | Yes         | Yes         | No  | Yes | Yes | Yes | Yes | No  | No  | Low                |
| Schwingshackl, 2014      | Yes      | Yes         | No | Partial yes | Yes | No  | Partial yes | Yes         | Yes         | No  | Yes | Yes | Yes | Yes | Yes | Yes | Moderate           |
| Wu, 2016                 | Yes      | Partial yes | No | Partial yes | Yes | Yes | Partial yes | Partial yes | Yes         | No  | Yes | No  | No  | Yes | Yes | Yes | Low                |
| Yu, 2014                 | Yes      | Partial yes | No | Partial yes | No  | Yes | No          | Partial yes | Partial yes | No  | Yes | No  | Yes | No  | Yes | No  | Low                |
| Zhang, 2020              | Yes      | Partial yes | No | Partial yes | No  | Yes | Partial yes | Yes         | Yes         | No  | Yes | No  | Yes | Yes | Yes | Yes | Low                |
| Zhao, 2017               | No       | Partial yes | No | Partial yes | Yes | No  | Partial yes | Yes         | Yes         | No  | Yes | No  | Yes | Yes | Yes | Yes | Critically low     |
| Zhao, 2022               | Yes      | Yes         | No | Partial yes | Yes | Yes | Partial yes | Yes         | Yes         | No  | Yes | No  | Yes | Yes | Yes | Yes | Low                |

Q = Item. Q1 = Did the research questions and inclusion criteria for the review include the components of PICO?, Q2 = Did the report of the review contain an explicit statement that the review methods were established prior to the conduct of the review and did the report justify any significant deviations from the protocol?, Q3 = Did the review authors explain their selection of the study designs for inclusion in the review?, Q4 = Did the review authors use a comprehensive literature search strategy?, Q5 = Did the review authors perform study selection in duplicate?, Q6 = Did the review authors perform data extraction in duplicate?, Q7 = Did the review authors provide a list of excluded studies and justify the exclusions?, Q8 = Did the review authors describe the included studies in adequate detail?, Q9 = Did the review authors use a satisfactory technique for assessing the risk of bias [RoB] in individual studies that were included in the review?, Q10 = Did the review authors report on the sources of funding for the studies included in the review?, Q11 = If meta-analysis

---

was performed, did the review authors use appropriate methods for statistical combination of results?, **Q12** = If meta-analysis was performed, did the review authors assess the potential impact of RoB in individual studies on the results of the meta-analysis or other evidence synthesis?, **Q13** = Did the review authors account for RoB in individual studies when interpreting/discussing the results of the review?, **Q14** = Did the review authors provide a satisfactory explanation for, and discussion of, any heterogeneity observed in the results of the review?, **Q15** = If they performed quantitative synthesis, did the review authors carry out an adequate investigation of publication bias [small study bias] and discuss its likely impact on the results of the review?, **Q16** = Did the review authors report any potential sources of conflict of interest, including any funding they received for conducting the review?

Satisfactory percentages are based on the total meta-analyses for which the dimension was judged applicable. Q1, Q4, Q9, Q11, Q12 and Q15 were used to assess the overall confidence.

---

**Supplementary Table S6. Assessment across the meta-analyses reporting association between dietary patterns or single food components and pancreatic**

**cancer risk**

| Reference                               | Significance threshold reached (fixed effects) | Significance threshold reached (random effects) | Number of cases | Estimate of heterogeneity<br>>50% substantial<br>>75 considerable | 95% prediction interval  | Small study effects | Strength of evidence |
|-----------------------------------------|------------------------------------------------|-------------------------------------------------|-----------------|-------------------------------------------------------------------|--------------------------|---------------------|----------------------|
| <b>Healthy diet (HD)</b>                |                                                |                                                 |                 |                                                                   |                          |                     |                      |
| Alizadeh, 2017                          | <0.05                                          | >0.05                                           | >1000           | Substantial                                                       | Including the null value | No                  | No evidence          |
| Lu, 2017                                | <0.001                                         | <0.001                                          | >1000           | Not large                                                         | Including the null value | No                  | Highly suggestive    |
| Grosso, 2017 (CC)                       | <0.001                                         | <0.001                                          | >1000           | Substantial                                                       | Including the null value | No                  | Highly suggestive    |
| Grosso, 2017 (CO)                       | >0.05                                          | >0.05                                           | <1000           | Not large                                                         | Including the null value | No                  | No evidence          |
| <b>Mediterranean Diet</b>               |                                                |                                                 |                 |                                                                   |                          |                     |                      |
| Schwingshackl, 2014                     | <0.001                                         | >0.05                                           | <1000           | Considerable                                                      | Including the null value | N.E.                | No evidence          |
| <b>Plant-based diet</b>                 |                                                |                                                 |                 |                                                                   |                          |                     |                      |
| Zhao, 2022 (CO)                         | <0.001                                         | <0.001                                          | >1000           | Substantial                                                       | Including the null value | Yes                 | Highly suggestive    |
| Zhao, 2022 (CC)                         | <0.001                                         | <0.001                                          | >1000           | Not large                                                         | Including the null value | No                  | Highly suggestive    |
| <b>Dietary Inflammatory Index (DII)</b> |                                                |                                                 |                 |                                                                   |                          |                     |                      |
| Guo, 2021                               | <0.001                                         | <0.001                                          | >1000           | Considerable                                                      | Including the null value | No                  | Suggestive           |
| Jayedi, 2018                            | n.a.                                           | n.a.                                            | >1000           | Substantial                                                       | N.E.                     | N.E.                | Weak evidence        |
| <b>Western diet</b>                     |                                                |                                                 |                 |                                                                   |                          |                     |                      |
| Alizadeh, 2017                          | <0.05                                          | >0.05                                           | >1000           | Substantial                                                       | Including the null value | No                  | No evidence          |

|                               |        |        |       |             |                          |     |                   |
|-------------------------------|--------|--------|-------|-------------|--------------------------|-----|-------------------|
| Lu, 2017                      | <0.001 | <0.05  | >1000 | Substantial | Including the null value | No  | Weak evidence     |
| <b>Unhealthy diet</b>         |        |        |       |             |                          |     |                   |
| Grosso, 2017 (CC)             | <0.001 | <0.05  | >1000 | Not large   | Including the null value | Yes | Weak evidence     |
| Grosso, 2017 (CO)             | >0.05  | >0.05  | <1000 | Not large   | Including the null value | Yes | No evidence       |
| <b>Total fruit</b>            |        |        |       |             |                          |     |                   |
| Paluszkiewicz, 2012           | <0.001 | <0.001 | >1000 | Not large   | Including the null value | No  | Highly suggestive |
| Wu, 2016                      | <0.001 | <0.001 | >1000 | Substantial | Including the null value | No  | Highly suggestive |
| <b>Citrus fruit</b>           |        |        |       |             |                          |     |                   |
| Bae, 2009                     | <0.05  | <0.05  | >1000 | Not large   | Including the null value | Yes | Weak evidence     |
| <b>Total vegetables</b>       |        |        |       |             |                          |     |                   |
| Paluszkiewicz, 2012           | <0.001 | <0.001 | >1000 | Not large   | Excluding the null value | No  | Convincing        |
| Wu, 2016                      | <0.001 | <0.001 | >1000 | Not large   | Including the null value | No  | Highly suggestive |
| <b>Cruciferous vegetables</b> |        |        |       |             |                          |     |                   |
| Li, 2015                      | <0.001 | <0.05  | >1000 | Substantial | Including the null value | No  | Weak evidence     |
| <b>Red meat</b>               |        |        |       |             |                          |     |                   |
| Han, 2019†                    | n.a    | n.a.   | n.a.  | n.a.        | n.a.                     |     | N.E.              |
| Larsson, 2012                 | >0.05  | >0.05  | >1000 | Substantial | Including the null value | No  | No evidence       |
| Paluszkiewicz, 2012           | <0.001 | <0.001 | >1000 | Not large   | Excluding the null value | No  | Convincing        |
| Zhao, 2017 (M/F)              | <0.001 | >0.05  | >1000 | Substantial | Including the null value | No  | No evidence       |
| Zhao, 2017 (M)                | <0.001 | <0.05  | >1000 | Not large   | Excluding the null value | No  | Weak evidence     |
| Zhao, 2017 (F)                | >0.05  | >0.05  | >1000 | Not large   | Including the null value | No  | No evidence       |

| Processed meat      |        |       |       |           |                          |      |               |
|---------------------|--------|-------|-------|-----------|--------------------------|------|---------------|
| Larsson, 2012       | <0.05  | <0.05 | >1000 | Not large | Excluding the null value | No   | Weak evidence |
| Zhao, 2017 (M/F)    | <0.001 | <0.05 | >1000 | Not large | Including the null value | No   | Weak evidence |
| Zhao, 2017 (M)      | <0.05  | <0.05 | >1000 | Not large | Excluding the null value | No   | Weak evidence |
| Zhao, 2017 (F)      | >0.05  | >0.05 | >1000 | Not large | Including the null value | No   | No evidence   |
| Poultry             |        |       |       |           |                          |      |               |
| Gao, 2022           | >0.05  | >0.05 | >1000 | Not large | Excluding the null value | No   | No evidence   |
| Paluszkiewicz, 2012 | >0.05  | >0.05 | >1000 | Not large | Including the null value | No   | No evidence   |
| Eggs                |        |       |       |           |                          |      |               |
| Paluszkiewicz, 2012 | >0.05  | >0.05 | >1000 | Not large | Including the null value | No   | No evidence   |
| Fish                |        |       |       |           |                          |      |               |
| Gao, 2022           | >0.05  | >0.05 | >1000 | Not large | Excluding the null value | No   | No evidence   |
| Jiang, 2019         | >0.05  | >0.05 | >1000 | Not large | Including the null value | No   | No evidence   |
| Paluszkiewicz, 2012 | <0.05  | ≥0.05 | >1000 | Not large | Including the null value | No   | No evidence   |
| Qin, 2012           | >0.05  | >0.05 | >1000 | Not large | Including the null value | No   | No evidence   |
| Yu, 2014            | >0.05  | >0.05 | >1000 | Not large | Including the null value | No   | No evidence   |
| Whole grain         |        |       |       |           |                          |      |               |
| Jacobs, 1998‡       | n.a.   | n.a.  | >1000 | n.a.      | n.a.                     | n.a. | Weak evidence |
| Lei, 2016‡          | n.a.   | <0.05 | >1000 | Not large | n.a.                     | n.a. | Weak evidence |
| Potato              |        |       |       |           |                          |      |               |
| Daroghegi Mofrad‡   | n.a.   | <0.05 | >1000 | n.a.      | n.a.                     |      | Weak evidence |
| Nuts                |        |       |       |           |                          |      |               |

|               |       |       |       |           |                          |    |               |
|---------------|-------|-------|-------|-----------|--------------------------|----|---------------|
| Naghshi, 2021 | <0.05 | <0.05 | >1000 | Not large | Including the null value | No | Weak evidence |
| Zhang, 2020   | <0.05 | <0.05 | >1000 | Not large | Including the null value | No | Weak evidence |

‡The meta-analysis did not provide adequate data to estimate the summary effect size; we report the random-effects summary effect size as presented by the authors of the original meta-analysis. n.a. = not available; NE = not estimable because less than 3 studies were available for each meta-analysis or because data not available

**Supplementary Table S7.** Bias assessment of meta-analyses reporting association between dietary patterns or single food components and pancreatic cancer risk

| Reference                               | Largest study<br>(95% CI) | SE   | Egger test p-value |
|-----------------------------------------|---------------------------|------|--------------------|
| <b>Healthy diet (HD)</b>                |                           |      |                    |
| Alizadeh, 2017                          | 1.02 (0.81; 1.24)         | 0.11 | 0.40               |
| Lu, 2017                                | 0.84 (0.72-0.98)          | 0.07 | 0.54               |
| Grosso, 2017 (CC)                       | 0.55 (0.35-0.86)          | 0.23 | 0.96               |
| Grosso, 2017 (CO)                       | 1.25 (0.84-1.86)          | 0.20 | 0.46               |
| <b>Mediterranean diet</b>               |                           |      |                    |
| Schwingshackl                           | 0.82 (0.72-0.93)          | 0.07 | N.E.               |
| <b>Plant-based diet</b>                 |                           |      |                    |
| Zhao, 2022 (CO)                         | 0.35 (0.17-0.73)          | 0.06 | 0.00               |
| Zhao, 2022 (CC)                         | 0.93 (0.71-1.23)          | 0.14 | 0.41               |
| <b>Dietary Inflammatory Index (DII)</b> |                           |      |                    |
| Guo, 2021                               | 1.24 (1.11-1.38)          | 0.05 | 0.17               |
| Jayedi, 2018                            | n.a.                      | n.a. | n.a.               |
| <b>Western diet</b>                     |                           |      |                    |
| Alizadeh, 2017                          | 0.71 (0.26-1.16)          | 0.23 | 0.12               |
| Lu, 2017                                | 1.28 (1.04-1.57)          | 0.11 | 0.98               |
| <b>Unhealthy diet</b>                   |                           |      |                    |
| Grosso, 2017 (CC)                       | 0.52 (0.14-0.88)          | 0.18 | 0.03               |
| Grosso, 2017 (CO)                       | 0.74 (0.48-1.14)          | 0.22 | 0.02               |
| <b>Total fruit</b>                      |                           |      |                    |
| Paluszkiewicz, 2012 <sup>a</sup>        | 1.02 (0.61-1.09)          | 0.15 | 0.02               |
| Wu, 2016 <sup>a</sup>                   | 0.89 (0.77-1.04)          | 0.08 | 0.01               |
| <b>Citrus fruit</b>                     |                           |      |                    |
| Bae, 2009                               | 0.00 (-0.20; 0.20)        | 0.10 | 0.08               |
| <b>Total vegetables</b>                 |                           |      |                    |
| Paluszkiewicz, 2012                     | 0.83 (0.75-1.01)          | 0.07 | 0.38               |
| Wu, 2016 <sup>a</sup>                   | 1.02 (0.84-1.24)          | 0.10 | 0.09               |
| <b>Cruciferous vegetables</b>           |                           |      |                    |
| Li, 2015                                | 0.9 (0.63-0.91)           | 0.09 | 0.32               |
| <b>Red meat</b>                         |                           |      |                    |
| Han, 2019 <sup>‡</sup>                  | n.a.                      | n.a. | n.a.               |



|                       |                    |      |      |
|-----------------------|--------------------|------|------|
| Larsson, 2012         | 1.11(0.92-1.33)    | 0.09 | 0.90 |
| Paluszkiewicz, 2012   | 1.00 (0.94-1.38)   | 0.09 | 0.64 |
| Zhao, 2017 (M/F)      | 1.22 (1.01-1.47)   | 0.09 | 0.26 |
| Zhao, 2017 (M)        | 1.1 (0.9-1.34)     | 0.10 | 0.49 |
| Zhao, 2017 (F)        | 1.01 (0.74-1.38)   | 0.16 | 0.54 |
| <b>Processed meat</b> |                    |      |      |
| Larsson, 2012         | 1.09 (0.86-1.38)   | 0.07 | 0.53 |
| Zhao, 2017 (M/F)      | 1.22 (1.01-1.47)   | 0.09 | 0.56 |
| Zhao, 2017 (M)        | 1.33 (1.11-1.59)   | 0.09 | 0.85 |
| Zhao, 2017 (F)        | 0.97 (0.73-1.29)   | 0.15 | 0.79 |
| <b>Poultry</b>        |                    |      |      |
| Gao, 2022             | 0.16 (-0.04; 0.36) | 0.01 | 0.94 |
| Paluszkiewicz, 2012   | 1.03 (0.93-1.14)   | 0.05 | 0.43 |
| <b>Eggs</b>           |                    |      |      |
| Paluszkiewicz, 2012   | 0.95 (0.89-1.03)   | 0.04 | 0.80 |
| <b>Fish</b>           |                    |      |      |
| Gao, 2022             | 0.89 (0.77-1.02)   | 0.07 | 0.49 |
| Jiang., 2019          | 1.07 (0.92-1.24)   | 0.08 | 0.70 |
| Paluszkiewicz, 2012   | 1.02 (0.92-1.12)   | 0.05 | 0.78 |
| Qin, 2012             | 0.91 (0.75-1.11)   | 0.10 | 0.39 |
| Yu, 2014              | 0.91 (0.75-1.11)   | 0.10 | 0.31 |
| <b>Potato</b>         |                    |      |      |
| Darooghegi Mofrad†    | n.a.               | n.a. | n.a. |
| <b>Whole grain</b>    |                    |      |      |
| Jacobs, 1998†         | n.a.               | n.a. | n.a. |
| Lei, 2016†            | n.a.               | n.a. | n.a. |
| <b>Nuts</b>           |                    |      |      |
| Naghshi, 2021         | 1.14(0.58-2.25)    | 0.18 | 0.86 |
| Zhang, 2020           | 0.93 (0.85-1.03)   | 0.05 | 0.36 |

†The meta-analysis did not provide adequate data to estimate the summary effect size; we report the random-effects summary effect size as presented by the authors of the original meta-analysis. <sup>a</sup> The Egger test was statistically significant (p<0.10) but the largest study had larger effect size compared to the summary effect size under random effects, denoting the absence of small-study effects

n.a.: not available; N.E. = not estimable because less than 3 studies were available for each meta-analysis.
